# Supplementary material
Source: PubMed Central journal article supplement (PMC4841709)
Supplement: NIHMS769591-supplement-1.pdf [file NIHMS769591-supplement-1.pdf]

## Supplementary Information:

### SUPPLEMENTARY MATERIALS AND METHODS

SUPPLEMENTARY TABLE 1: The SNPs and genes under study

SUPPLEMENTARY TABLE 2: The results of all analyses of phenotype intake values in the discovery sample (see Supplementary Table 2.xlsx (separate file)). Notes: \*: highlights the SNPs reported to associate to longevity in previous studies of the genotype data (Soerensen et al., 2012 and Soerensen et al., 2013).

SUPPLEMENTARY TABLE 3: Association study of the change in phenotypes during seven years of follow-up in the discovery sample and the five SNPs found to associate to the phenotypes at the beginning of follow-up.

SUPPLEMENTARY TABLE 4: Replication study of the initial findings.

SUPPLEMENTARY FIGURE 1: Average individual decline from 93 to 100 years of age for the phenotypes investigated for association to one of the five SNPs significantly associated to the intake values.

### References:

Soerensen, M., Dato, S., Tan, Q., Thinggaard, M., Kleindorp, R., Beekman, M., Jacobsen, R., Suchiman, H.E., de Craen, A.J., Westendorp, R.G., Schreiber, S., Stevnsner, T., Bohr, V.A., Slagboom, P.E., Nebel, A., Vaupel, J.W., Christensen, K., McGue, M., Christiansen, L., 2012. Human longevity and variation in GH/IGF-1/insulin signaling, DNA damage signaling and repair and pro/antioxidant pathway genes: cross sectional and longitudinal studies. *Exp. Gerontol.* 47 (5), 379-87.

Soerensen, M., Dato, S., Tan, Q., Thinggaard, M., Kleindorp, R., Beekman, M., Suchiman, H.E., Jacobsen, R., McGue, M., Stevnsner, T., Bohr, V.A., de Craen, A.J., Westendorp, R.G., Schreiber, S., Slagboom, P.E., Nebel, A., Vaupel, J.W., Christensen, K., Christiansen, L., 2013. Evidence from case-control and longitudinal studies supports associations of genetic variation in APOE, CETP, and IL6 with human longevity. *Age (Dordr)* 35 (2), 487-500.

## **SUPPLEMENTARY MATERIALS AND METHODS**

### **The phenotypes under study**

Six phenotypes were investigated here. Briefly, two cognitive state phenotypes were considered: the Mini-Mental State Examination (MMSE) (Folstein et al., 1975), as well as a cognitive composite score (McGue and Christensen, 2002). The latter was included to explore verbal fluency, forward and backward digit span, and immediate and delayed recall. As the MMSE data are not suitable for analysis by linear regression, we produced a categorical variable with three groups:  $MMSE < 18$ ,  $MMSE \geq 18$  to  $< 24$  and  $MMSE \geq 24$ , which is compatible to severe cognitive impairment, mild cognitive impairment and no cognitive impairment (Nybo et al., 2003). Handgrip strength was measured using a hand-held dynamometer (SMEDLEY' dynamometer, Scandidact, Kvistgaard, Denmark), using the maximum of three measurements with the strongest hand. Self-rated health was evaluated by asking the participants "How do you consider your health in general?" with five response categories: very poor, poor, acceptable, good, and excellent. For assessment of ADL, we employed a five item ADL disability score, which was based the Katz ADL index on bathing, dressing, toileting, transfer and feeding (Katz et al., 1970); the score was categorized into 'disabled = could do maximum 2 items', 'moderately disabled = could do 3 or 4 items' or 'not disabled = could do all five items'. To enable the depiction of physical functioning and endurance we, moreover, used an 11 item ADL strength score related to among others the ability to walk, run, go upstairs and carrying weights. Each item was categorized into 'could not do', 'could do with difficulty or an aid', 'could do with fatigue' and 'could do without fatigue' and an average over the 11 items was taken (Christensen et al., 2000 and Nybo et al., 2001). For analysing the ADL strength score, the data were split into four groups based on the quartiles, with increasing value corresponding to increased strength score (decreased fatigue).

## **Selection of candidate genes and variants, genotyping and data cleaning in the discovery sample**

The selection of genes and gene variants, and the generation of genotype data are described in detail in (Soerensen et al., 2012 and Soerensen et al., 2013). In short, first comprehensive literature and data base searches, applying the search terms ‘human longevity’, ‘human aging’, ‘age related disease’ (including specific diseases e.g. myocardial infarction), ‘premature aging syndromes’ and ‘model organisms of aging and longevity’, were performed for identifying candidate genes and SNPs. Secondly, the chromosomal regions of each candidate gene plus 5,000 bp upstream and 1,000 bp downstream were determined, so were tagging SNPs and potential functional SNPs (i.e. coding non-synonymous SNPs, SNPs in potential splice sites or transcription factor binding sites and SNPs potentially causing frame shifts or nonsense-mediated mRNA decay) within the gene regions. The tagging SNPs were recovered via the HapMap consortium database for the CEU population. Finally, the QIAamp DNA Mini and Micro Kits (Qiagen, Düsseldorf, Germany) were employed for purification of DNA from blood spot cards, while the Illumina GoldenGate platform (Illumina Inc., San Diego, CA, USA) was used for SNP genotyping. Data cleaning was accomplished according to the manufacturers’ recommendations; after data cleaning the final sample size was 1,088 oldest-olds.

## References

- Christensen, K., McGue, M., Yashin, A., Iachine, I., Holm, N.V., Vaupel, J.W., 2000. Genetic and environmental influences on functional abilities in Danish twins aged 75 years and older. *J. Gerontol. A. Biol. Sci. Med. Sci.* 55 (8), M446-M452.
- Folstein, M.F., Folstein, S.E., McHugh, P.R., 1975. Mini-mental state. A practical method for grading the cognitive state of patients for the clinician. *J. Psychiatr. Res.* 12 (3), 189-98.
- Katz, S., Downs, T.D., Cash, H.R., Grotz, R.C., 1970. Progress in development of the index of ADL. *Gerontologist* 10 (1), 20-30.
- McGue, M., Christensen, K., 2002. The heritability of level and rate-of-change in cognitive functioning in Danish twins aged 70 years and older. *Exp. Aging. Res.* 28 (4), 435-451.
- Nybo, H., Gaist, D., Jeune, B., McGue, M., Vaupel, J.W., Christensen, K., 2001. Functional status and self-rated health in 2,262 nonagenarians: the Danish 1905 Cohort Survey. *J. Am. Geriatr. Soc.* 49 (5), 601-609.
- Nybo, H., Petersen, H.C., Gaist, D., Jeune, B., Andersen, K., McGue, M., Vaupel, J.W., Christensen, K., 2003. Predictors of mortality in 2,249 nonagenarians--the Danish 1905-Cohort Survey. *J. Am. Geriatr. Soc.* 51 (10), 1365-1373.
- Soerensen, M., Dato, S., Tan, Q., Thinggaard, M., Kleindorp, R., Beekman, M., Jacobsen, R., Suchiman, H.E., de Craen, A.J., Westendorp, R.G., Schreiber, S., Stevnsner, T., Bohr, V.A., Slagboom, P.E., Nebel, A., Vaupel, J.W., Christensen, K., McGue, M., Christiansen, L., 2012. Human longevity and variation in GH/IGF-1/insulin signaling, DNA damage signaling and repair and pro/antioxidant pathway genes: cross sectional and longitudinal studies. *Exp. Gerontol.* 47 (5), 379-87.
- Soerensen, M., Dato, S., Tan, Q., Thinggaard, M., Kleindorp, R., Beekman, M., Suchiman, H.E., Jacobsen, R., McGue, M., Stevnsner, T., Bohr, V.A., de Craen, A.J., Westendorp, R.G., Schreiber,

S., Slagboom, P.E., Nebel, A., Vaupel, J.W., Christensen, K., Christiansen, L., 2013. Evidence from case-control and longitudinal studies supports associations of genetic variation in APOE, CETP, and IL6 with human longevity. *Age (Dordr)* 35 (2), 487-500.

**SUPPLEMENTARY TABLE 1: The SNPs and Genes under Study**

|                  | Gene    | Number of SNPs |            |            |            |            |            |            |           |           |           |           |           |
|------------------|---------|----------------|------------|------------|------------|------------|------------|------------|-----------|-----------|-----------|-----------|-----------|
| DNA repair genes | ACD     | 2              | rs14920    | rs6979     |            |            |            |            |           |           |           |           |           |
|                  | APEX1   | 2              | rs1048945  | rs3136817  |            |            |            |            |           |           |           |           |           |
|                  | APTX    | 8              | rs1016674  | rs10813916 | rs10971264 | rs1125479  | rs1197774  | rs13296038 | rs3780476 | rs3824457 |           |           |           |
|                  | ATM     | 8              | rs170548   | rs17503908 | rs1800058  | rs1800889  | rs1801516  | rs611646   | rs639923  | rs664677  |           |           |           |
|                  | ATR     | 8              | rs10804682 | rs11920625 | rs1802904  | rs2227928  | rs2229032  | rs6805118  | rs7630115 | rs9856772 |           |           |           |
|                  | BLM     | 15             | rs2270132  | rs2518967  | rs2518968  | rs2532105  | rs3784782  | rs3815003  | rs389480  | rs401549  | rs414634  | rs4932365 | rs7162960 |
|                  |         |                | rs7165117  | rs7165790  | rs7179346  | rs7184015  |            |            |           |           |           |           |           |
|                  | BRIP1   | 13             | rs11652980 | rs16945628 | rs16945643 | rs2048718  | rs2191248  | rs2378908  | rs4986764 | rs4988340 | rs4988357 | rs6504063 | rs8076746 |
|                  |         |                | rs8077088  | rs9908659  |            |            |            |            |           |           |           |           |           |
|                  | C10orf2 | 1              | rs3740487  |            |            |            |            |            |           |           |           |           |           |
|                  | DCLRE1C | 12             | rs10128350 | rs10796227 | rs10906777 | rs11259405 | rs11593133 | rs12572872 | rs3814176 | rs4237441 | rs7900814 | rs7906952 | rs7916722 |
|                  |         |                | rs7920514  |            |            |            |            |            |           |           |           |           |           |
|                  | DDB1    | 3              | rs17549396 | rs2230356  | rs9651726  |            |            |            |           |           |           |           |           |
|                  | DDB2    | 6              | rs1685404  | rs2013867  | rs2291120  | rs3824866  | rs4567413  | rs4647709  |           |           |           |           |           |
|                  | ERCC1   | 6              | rs11615    | rs3212948  | rs3212955  | rs3212961  | rs3212964  | rs762562   |           |           |           |           |           |
|                  | ERCC2   | 9              | rs13181    | rs1799788  | rs238404   | rs238407   | rs238415   | rs3810366  | rs3916874 | rs50871   | rs50872   |           |           |
|                  | ERCC3   | 4              | rs4150403  | rs4150454  | rs4150459  | rs4150506  |            |            |           |           |           |           |           |
|                  | ERCC4   | 4              | rs1364362  | rs1799802  | rs1800067  | rs3136202  |            |            |           |           |           |           |           |
|                  | ERCC5   | 13             | rs17655    | rs2227869  | rs2296147  | rs3759500  | rs4150350  | rs4150351  | rs4150355 | rs4150383 | rs4150386 | rs4150393 | rs7325708 |
|                  |         |                | rs876430   | rs9514065  |            |            |            |            |           |           |           |           |           |
|                  | ERCC6   | 11             | rs1012553  | rs1018603  | rs1964145  | rs2228527  | rs2228528  | rs2228529  | rs3793784 | rs4253079 | rs4253164 | rs4253200 | rs4838519 |
|                  | ERCC8   | 8              | rs1021005  | rs12522154 | rs158931   | rs158937   | rs17332991 | rs2306350  | rs4647068 | rs7726671 |           |           |           |
|                  | EXO1    | 16             | rs1047840  | rs11581448 | rs12118937 | rs12564134 | rs1635518  | rs1776131  | rs1776177 | rs2797604 | rs4149855 | rs4149867 | rs4149965 |
|                  |         |                | rs4150018  | rs4150027  | rs4408133  | rs735943   | rs9350     |            |           |           |           |           |           |
|                  | FANCA   | 11             | rs1006548  | rs12924101 | rs16966142 | rs17226075 | rs1800339  | rs2238526  | rs3743860 | rs7187436 | rs7190823 | rs8046872 | rs9282681 |
|                  | FANCD2  | 7              | rs2075310  | rs3172417  | rs6775725  | rs6792811  | rs6807485  | rs803335   | rs9875081 |           |           |           |           |
| FEN1             | 2       | rs412334       | rs695867   |            |            |            |            |            |           |           |           |           |           |
| H2AFX            | 2       | rs2509049      | rs640603   |            |            |            |            |            |           |           |           |           |           |
| HMGB1            | 1       | rs3742305      |            |            |            |            |            |            |           |           |           |           |           |
| LIG1             | 8       | rs156640       | rs156641   | rs20580    | rs2304136  | rs274860   | rs3731037  | rs7246512  | rs8100261 |           |           |           |           |
| LIG3             | 4       | rs1052536      | rs2074516  | rs3135989  | rs3135998  |            |            |            |           |           |           |           |           |







|                    |         |            |            |            |            |            |            |            |            |            |            |            |           |
|--------------------|---------|------------|------------|------------|------------|------------|------------|------------|------------|------------|------------|------------|-----------|
| GH/IGF-1/INS genes | FOXO4   | 2          | rs5980741  | rs5980742  |            |            |            |            |            |            |            |            |           |
|                    | GH1     | 3          | rs2854184  | rs3020619  | rs3744287  |            |            |            |            |            |            |            |           |
|                    | GHR     | 20         | rs11739840 | rs11744988 | rs12153009 | rs12187996 | rs12233949 | rs13182117 | rs1509453  | rs17230998 | rs17574650 | rs2940918  | rs2972418 |
|                    |         |            | rs4130113  | rs4410646  | rs4547964  | rs6180     | rs6451620  | rs6451634  | rs6883523  | rs7702524  | rs7703713  |            |           |
|                    | GHRH    | 2          | rs1073768  | rs6032470  |            |            |            |            |            |            |            |            |           |
|                    | GHRHR   | 11         | rs10225302 | rs11761979 | rs2267723  | rs4723038  | rs4988494  | rs4988496  | rs4988498  | rs4988501  | rs4988504  | rs4988505  | rs6954044 |
|                    | GHRL    | 10         | rs10490815 | rs1617161  | rs26802    | rs27498    | rs27647    | rs35682    | rs3755777  | rs42451    | rs4684677  | rs696217   |           |
|                    | GHSR    | 4          | rs495225   | rs512692   | rs572169   | rs9819506  |            |            |            |            |            |            |           |
|                    | IDE     | 10         | rs11187033 | rs11187065 | rs17445328 | rs1887922  | rs2275218  | rs2421943  | rs4646957  | rs6583820  | rs7078413  | rs7899603  |           |
|                    | IGF1    | 13         | rs1019731  | rs10735380 | rs10778176 | rs10860865 | rs11111262 | rs11831436 | rs12821878 | rs1520220  | rs17727841 | rs2033178  | rs5742632 |
|                    |         |            | rs6214     | rs7136446  |            |            |            |            |            |            |            |            |           |
|                    | IGF1R   | 57         | rs1058696  | rs11247367 | rs11630259 | rs11630479 | rs12437963 | rs12440962 | rs12442093 | rs12592205 | rs12910200 | rs12916884 | rs1464430 |
|                    |         |            | rs1521483  | rs1546713  | rs1815009  | rs1879613  | rs2017500  | rs2139924  | rs2684787  | rs2684788  | rs2684790  | rs2684792  | rs2684796 |
|                    |         |            | rs2684799  | rs2684802  | rs2684806  | rs2684807  | rs2684811  | rs2715416  | rs2715419  | rs3743254  | rs3743258  | rs3784605  | rs4284619 |
|                    |         |            | rs4305005  | rs4965438  | rs4966008  | rs4966013  | rs4966014  | rs4966015  | rs4966038  | rs4966039  | rs4966042  | rs4966046  | rs7162336 |
|                    |         |            | rs7166348  | rs7168671  | rs7173191  | rs8025801  | rs8026157  | rs8032477  | rs8038056  | rs867431   | rs871335   | rs939626   | rs9672254 |
|                    |         |            | rs9672965  | rs9920651  |            |            |            |            |            |            |            |            |           |
|                    | IGF2    | 10         | rs1004446  | rs10770125 | rs17885652 | rs2239681  | rs2585     | rs3168310  | rs3213216  | rs3741211  | rs734351   | rs7481173  |           |
|                    | IGF2BP2 | 15         | rs11705701 | rs11708719 | rs11925694 | rs12635769 | rs1447890  | rs17293846 | rs2290066  | rs4402960  | rs4686692  | rs6770227  | rs6778126 |
|                    |         |            | rs6794209  | rs6799330  | rs7634540  | rs7648605  |            |            |            |            |            |            |           |
|                    | IGF2R   | 28         | rs1003737  | rs10945647 | rs10945649 | rs17200966 | rs1805075  | rs2282140  | rs2297370  | rs3734181  | rs3798176  | rs3798186  | rs3798187 |
|                    |         |            | rs3798189  | rs3798201  | rs3798207  | rs4709395  | rs633863   | rs6917747  | rs7755435  | rs8191745  | rs8191772  | rs8191811  | rs8191824 |
|                    |         |            | rs8191829  | rs9295119  | rs9347380  | rs9456490  | rs9456497  | rs9457795  |            |            |            |            |           |
| IGFALS             | 1       | rs344352   |            |            |            |            |            |            |            |            |            |            |           |
| IGFBP2             | 12      | rs1525608  | rs2270360  | rs3770473  | rs6413492  | rs7603372  | rs9341105  | rs9341130  | rs9341134  | rs9341145  | rs9341156  | rs9341191  |           |
|                    |         | rs9341201  |            |            |            |            |            |            |            |            |            |            |           |
| IGFBP3             | 9       | rs13223993 | rs2132571  | rs2453836  | rs2453839  | rs2471551  | rs3110697  | rs6670     | rs924140   | rs9282734  |            |            |           |
| INS                | 2       | rs3842748  | rs3842755  |            |            |            |            |            |            |            |            |            |           |
| INSR               | 29      | rs1035939  | rs10401628 | rs1052371  | rs11667110 | rs11672739 | rs11880337 | rs12979424 | rs1549616  | rs17253937 | rs1799817  | rs2059807  |           |
|                    |         | rs2252673  | rs2860175  | rs2860183  | rs2860184  | rs2963     | rs6510949  | rs6510956  | rs6510959  | rs7248939  | rs7254060  | rs7254487  |           |
|                    |         | rs7254921  | rs7258382  | rs8103483  | rs8110428  | rs8111710  | rs8112883  | rs891087   |            |            |            |            |           |
| IRS1               | 10      | rs10179720 | rs1025333  | rs1560251  | rs17208239 | rs17208470 | rs17347714 | rs17508368 | rs6436635  | rs6725330  | rs9282766  |            |           |

|                    |        |            |            |            |            |            |            |           |           |           |           |           |           |  |
|--------------------|--------|------------|------------|------------|------------|------------|------------|-----------|-----------|-----------|-----------|-----------|-----------|--|
| GH/IGF-1/INS genes | IRS2   | 14         | rs11618950 | rs12584136 | rs2099435  | rs4771644  | rs4773094  | rs7323191 | rs754204  | rs7997595 | rs7999797 | rs913949  | rs9515119 |  |
|                    |        |            | rs9521512  | rs9559648  | rs9559656  |            |            |           |           |           |           |           |           |  |
|                    | KL     | 19         | rs1207362  | rs1888057  | rs2283368  | rs2320762  | rs385564   | rs397703  | rs398655  | rs495392  | rs522796  | rs562020  | rs564481  |  |
|                    |        |            | rs575536   | rs576404   | rs648202   | rs657049   | rs687045   | rs9526984 | rs9527026 | rs9536314 |           |           |           |  |
|                    | PAPPA  | 18         | rs10122701 | rs10513270 | rs10817866 | rs12236532 | rs12344396 | rs1998499 | rs3761843 | rs3789280 | rs3789303 | rs398400  | rs449807  |  |
|                    |        |            | rs4837525  | rs7020782  | rs7025886  | rs731146   | rs7469968  | rs7869550 | rs978201  |           |           |           |           |  |
|                    | PDPK1  | 1          | rs1005273  |            |            |            |            |           |           |           |           |           |           |  |
|                    | PI3KCB | 2          | rs10513055 | rs361072   |            |            |            |           |           |           |           |           |           |  |
|                    | POU1F1 | 7          | rs10511134 | rs12486159 | rs177292   | rs2633674  | rs300982   | rs300994  | rs9824592 |           |           |           |           |  |
|                    | PROP1  | 5          | rs4431364  | rs4604209  | rs4610479  | rs6883364  | rs6890425  |           |           |           |           |           |           |  |
|                    | PTEN   | 7          | rs11202596 | rs11202600 | rs1234220  | rs17431184 | rs1903858  | rs1903860 | rs2736627 |           |           |           |           |  |
| PTPN1              | 7      | rs13045716 | rs2038526  | rs2426164  | rs6063534  | rs6067484  | rs6126033  | rs6512652 |           |           |           |           |           |  |
| SST                | 4      | rs10513819 | rs17796004 | rs2162189  | rs7624906  |            |            |           |           |           |           |           |           |  |
| SSTR2              | 5      | rs11077670 | rs1466113  | rs7210080  | rs7224362  | rs728291   |            |           |           |           |           |           |           |  |
| Additional genes   | ACE    | 11         | rs1055086  | rs1800764  | rs4291     | rs4295     | rs4309     | rs4311    | rs4331    | rs4335    | rs4343    | rs4344    | rs4351    |  |
|                    | APOA4  | 1          | rs2849174  |            |            |            |            |           |           |           |           |           |           |  |
|                    | APOC3  | 2          | rs5128     | rs595049   |            |            |            |           |           |           |           |           |           |  |
|                    | APOE   | 3          | rs405509   | rs440446   | rs769449   |            |            |           |           |           |           |           |           |  |
|                    | CETP   | 20         | rs11076175 | rs12708967 | rs12708974 | rs1800774  | rs1800775  | rs1800777 | rs1801706 | rs289714  | rs289742  | rs3764261 | rs4783961 |  |
|                    |        |            | rs4783962  | rs4784744  | rs5882     | rs5883     | rs6499863  | rs7205804 | rs9923854 | rs9929488 | rs9930761 |           |           |  |
|                    | HFE    | 6          | rs1572982  | rs1800708  | rs2858993  | rs707889   | rs9295687  | rs9379825 |           |           |           |           |           |  |
|                    | HSPA14 | 6          | rs10906772 | rs12770830 | rs17155992 | rs17268499 | rs7905174  | rs9787671 |           |           |           |           |           |  |
|                    | HSPA1A | 1          | rs1043618  |            |            |            |            |           |           |           |           |           |           |  |
|                    | HSPA1L | 4          | rs2075799  | rs2075800  | rs2227955  | rs2227956  |            |           |           |           |           |           |           |  |
|                    | IL6    | 2          | rs12700386 | rs2069827  |            |            |            |           |           |           |           |           |           |  |
|                    | IL6R   | 8          | rs12083537 | rs2229238  | rs4075015  | rs4240872  | rs4601580  | rs4845626 | rs6684439 | rs6689393 |           |           |           |  |
|                    | MTHFR  | 13         | rs11121832 | rs12121543 | rs1476413  | rs17037390 | rs17421462 | rs1801131 | rs1801133 | rs2066471 | rs3737964 | rs3737967 | rs4846048 |  |
|                    |        |            | rs4846052  | rs9651118  |            |            |            |           |           |           |           |           |           |  |
|                    | SIRT1  | 5          | rs12778366 | rs2236319  | rs2273773  | rs3758391  | rs3818291  |           |           |           |           |           |           |  |
| SIRT3              | 10     | rs1023430  | rs11246009 | rs11246020 | rs12226697 | rs3782116  | rs3825075  | rs4758633 | rs535716  | rs536715  | rs7104764 |           |           |  |
| SIRT6              | 3      | rs107251   | rs352492   | rs7260071  |            |            |            |           |           |           |           |           |           |  |
| TGFB1              | 7      | rs11466321 | rs11466338 | rs11466359 | rs1800469  | rs4803455  | rs8105161  | rs8110090 |           |           |           |           |           |  |

| Both genders (n=1,088)    |            |       |         |             |
|---------------------------|------------|-------|---------|-------------|
| Phenotype                 | SNP        | Coef. | p-value | 95% CI      |
| Cognitive composite score | rs10739239 | 0.07  | 0.132   | -0.02;0.17  |
|                           | rs10816492 | 0.07  | 0.171   | -0.03;0.16  |
| ADL strength score        | rs1061627  | -0.01 | 0.699   | -0.04;0.02  |
| Females (n=775)           |            |       |         |             |
| Phenotype                 | SNP        | Coef. | p-value | 95% CI      |
| Grip strength             | rs2227869  | 0.31  | 0.06    | -0.01;0.63  |
| Males (n=313)             |            |       |         |             |
| Phenotype                 | SNP        | Coef. | p-value | 95% CI      |
| Cognitive composite score | rs10739239 | -0.19 | 0.058   | -0.39;-0.01 |
| Self-rated health         | rs2849174  | -0.03 | 0.264   | -0.09;0.03  |

SUPPLEMENTARY TABLE 3: Association study of the change in phenotypes during seven years of follow-up in the discovery sample and the five SNPs found to associate to the phenotypes at the beginning of follow-up.

Notes: Coef: SNP-time interaction coefficient describing the change in phenotype during follow-up attributed to each copy of the minor allele. 95% CI: 95% confidence interval.

|                           |                    |            | Both genders discovery sample (n = 1,088) |                     |                       | Both genders replication sample (n=1,281) |                     |         |            | Pooled analyses     |                       |             |
|---------------------------|--------------------|------------|-------------------------------------------|---------------------|-----------------------|-------------------------------------------|---------------------|---------|------------|---------------------|-----------------------|-------------|
| Phenotype                 | Gene               | SNP        | MAF                                       | $\beta$ coefficient | p-value               | MAF                                       | $\beta$ coefficient | p-value | 95% CI     | $\beta$ coefficient | p-value               | 95% CI      |
| Cognitive composite score | <i>RAD23B</i>      | rs10739239 | 0.42                                      | -0.70               | $5.34 \times 10^{-6}$ | 0.42                                      | -0.05               | 0.745   | -0.33;0.24 | -0.34               | 0.002                 | -0.55;0.13  |
|                           | <i>RAD23B</i>      | rs10816492 | 0.47                                      | -0.59               | $8.63 \times 10^{-5}$ | 0.48                                      | 0.10                | 0.481   | -0.18;0.38 | -0.20               | 0.054                 | -0.41;0.01  |
|                           |                    |            |                                           | OR                  |                       | OR                                        |                     |         |            | OR                  | p-value               | 95% CI      |
| ADL strength score        | <i>RECQL</i>       | rs1061627  | 0.17                                      | 1.54                | $2.65 \times 10^{-5}$ | 0.18                                      | 1.13                | 0.196   | 0.94;1.35  | 1.31                | $8.9 \times 10^{-5}$  | 1.14;1.50   |
|                           |                    |            | Females discovery sample (n=775)          |                     |                       | Females replication sample (n=936)        |                     |         |            | Pooled analyses     |                       |             |
| Phenotype                 | Gene               | SNP        | MAF                                       | $\beta$ coefficient | p-value               | MAF                                       | $\beta$ coefficient | p-value | 95% CI     | $\beta$ coefficient | p-value               | 95% CI      |
| Handgrip strength         | <i>ERCC5</i>       | rs2227869  | 0.04                                      | -2.43               | $4.55 \times 10^{-5}$ | 0.04                                      | -0.29               | 0.609   | -1.42;0.83 | -1.38               | 0.001                 | -2.19;-0.56 |
|                           |                    |            | Males discovery sample (n=313)            |                     |                       | Males replication sample (n=345)          |                     |         |            | Pooled analyses     |                       |             |
|                           |                    |            | MAF                                       | $\beta$ coefficient | p-value               | MAF                                       | $\beta$ coefficient | p-value | 95% CI     | $\beta$ coefficient | p-value               | 95% CI      |
| Cognitive composite score | <i>RAD23B</i>      | rs10739239 | 0.42                                      | -1.20               | $2.83 \times 10^{-5}$ | 0.42                                      | -0.01               | 0.961   | -0.56;0.53 | -0.54               | 0.007                 | -0.93;-0.15 |
|                           |                    |            |                                           | OR                  |                       | OR                                        |                     |         |            | OR                  | p-value               | 95% CI      |
| Self-rated health         | <i>APOA4/APOC3</i> | rs2849174  | 0.29                                      | 2.10                | $4.71 \times 10^{-5}$ | 0.29                                      | 1.30                | 0.110   | 0.94;1.79  | 1.64                | $4.05 \times 10^{-5}$ | 1.30;2.08   |

SUPPLEMENTARY TABLE 4: Replication study of the initial findings.

Notes: MAF: minor allele frequency, 95% CI: 95% confidence interval and OR: odds ratio.

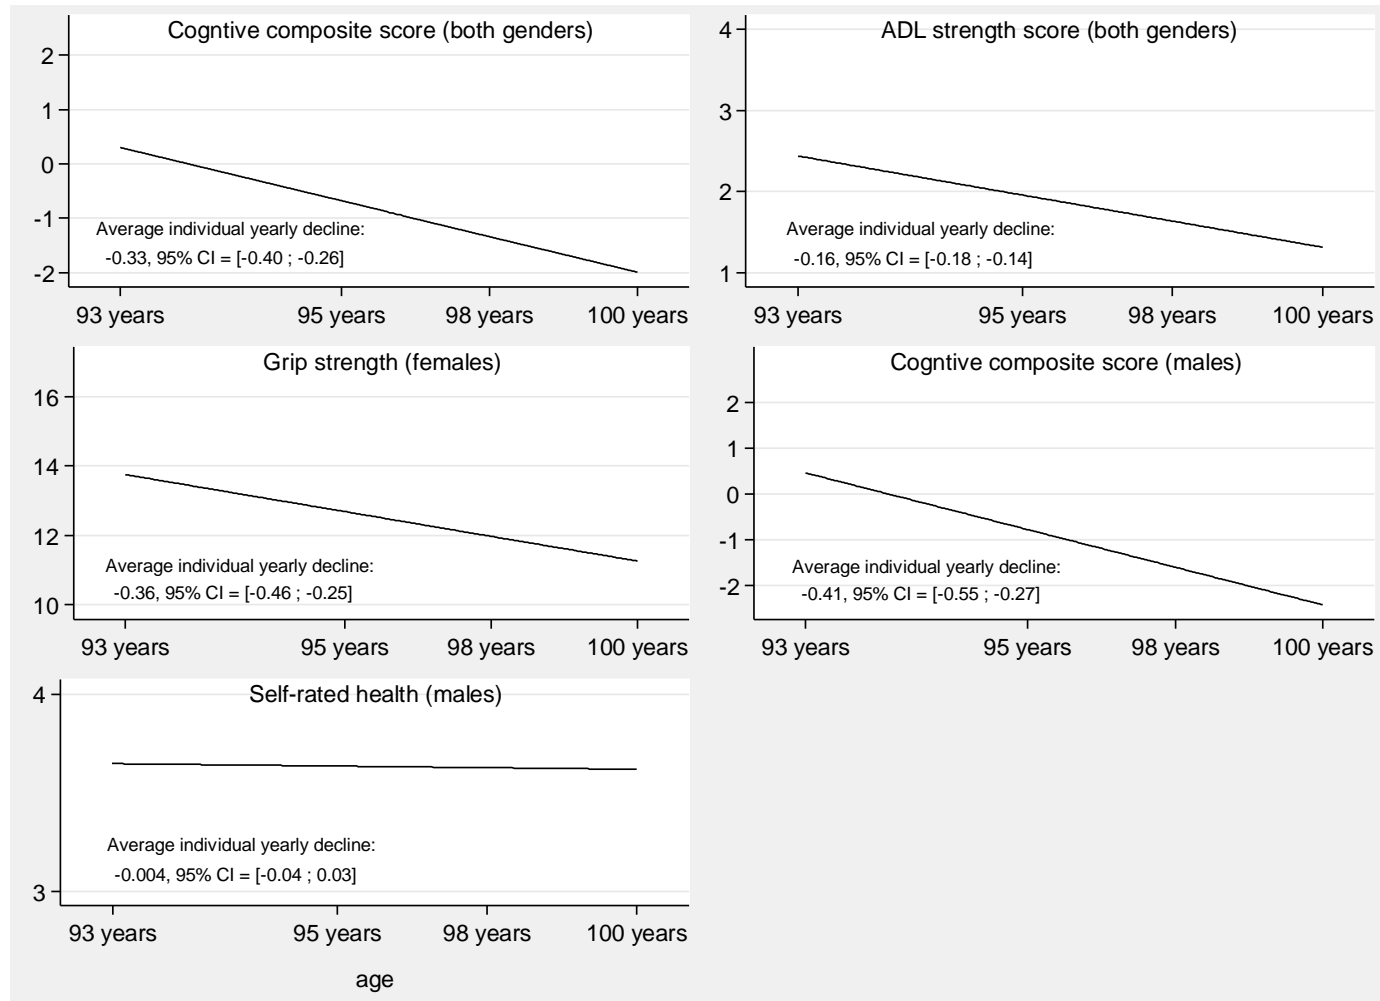

Supplementary Figure 1: Average individual decline from 93 to 100 years of age for the phenotypes investigated for association one of the 5 SNPs significantly associated to the intake values. The range of the Y-axes is the 25% to the 75% percentile of the phenotypes.
